# Supplementary material for: Eosinophils in the blood of hematopoietic stem cell transplanted patients are activated and have different molecular marker profiles in acute and chronic graft-versus-host disease
Source: PubMed Central journal article supplement (PMC4217552; doi:10.1002/iid3.25), 2014-07-07
Supplement: iid30002-0099-SD1.pdf [file iid30002-0099-SD1.pdf]

## Supplemental Data

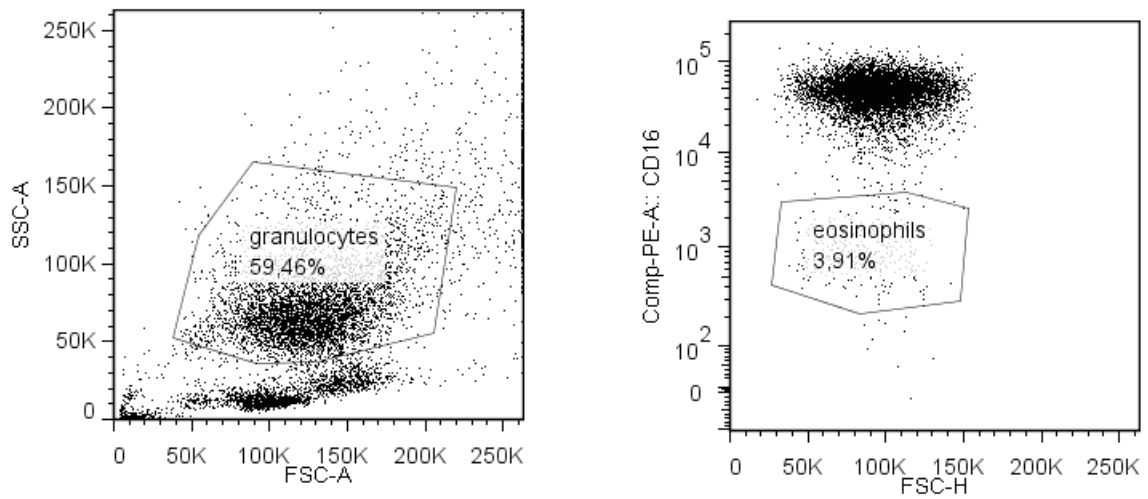

**SUPPLEMENTARY FIGURE.** Gating of eosinophil was performed on unfractionated leukocytes following repeated hypotonic lysis.
